# Supplementary material for: One step, high yield synthesis of amphiphilic carbon quantum dots derived from chia seeds: a solvatochromic study
Source: Royal Society of Chemistry journal article supplement (doi:10.1039/c7nj03513f), 2017-01-01
Supplement: c7nj03513f1.pdf [file c7nj03513f1.pdf]

## SUPPORTING INFORMATION

### One step, high yield synthesis of amphiphilic carbon quantum dots derived from chia seeds: A solvatochromic study

Solomon Jones<sup>a</sup>, Parikshit Sahatiya<sup>a</sup> and Sushmee Badhulika<sup>a,\*</sup>

<sup>a</sup>*Department of Electrical Engineering, Indian Institute of Technology Hyderabad, Hyderabad, 502285, India.*

*\*Corresponding author: E-mail: sbadh@iith.ac.in; Telephone: 040-23018443 Fax 04023016032*

#### Zeta Potential

Version 3.73 / 2.30

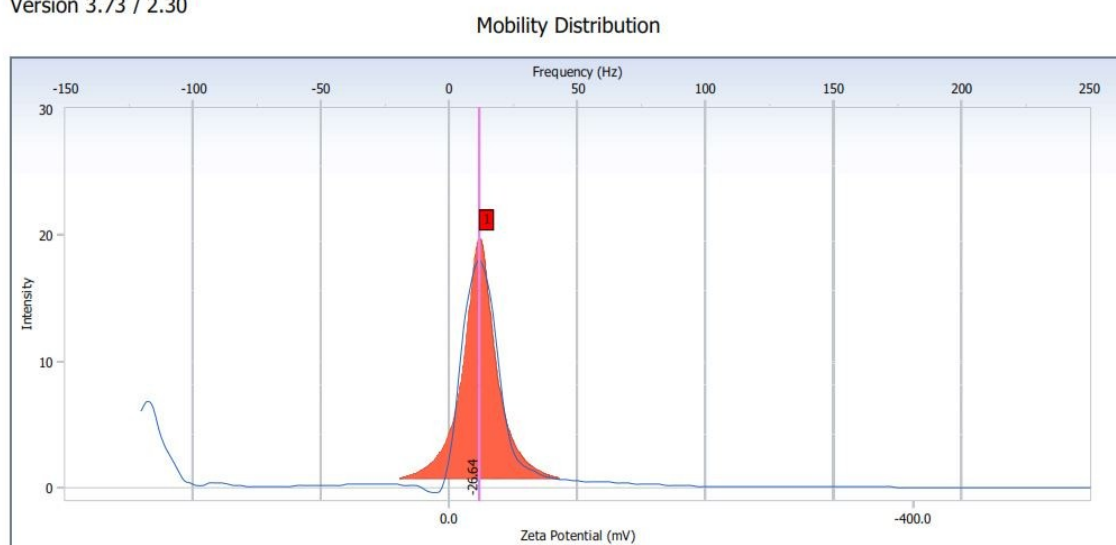

#### Measurement Results

|                |               |                       |                     |                |      |
|----------------|---------------|-----------------------|---------------------|----------------|------|
| Zeta Potential | : -26.64      | (mV)                  | Doppler shift       | : 12.05        | (Hz) |
| Mobility       | : -1.543e-004 | (cm <sup>2</sup> /Vs) | Base Frequency      | : 122.2        | (Hz) |
| Conductivity   | : 0.0049      | (mS/cm)               | Conversion Equation | : Smoluchowski |      |

Figure S1: Zeta potential of carbon dots dispersed in acetone

## Photoluminescence spectra

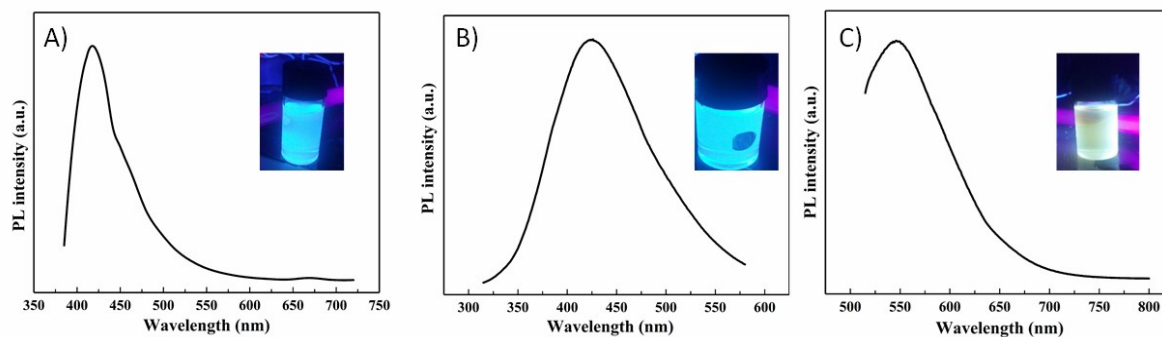

Figure S2: PL spectra of C-dots dispersed in A) Ethanol B) Methanol C) Dimethyl sulfoxide

## Absorbance spectra

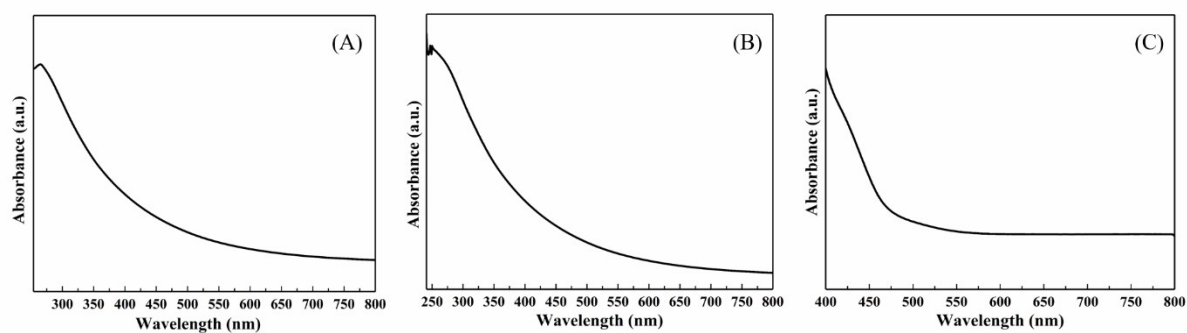

Figure S3: UV spectra of C-dots dispersed in A) Ethanol B) Methanol C) Dimethyl sulfoxide
